# Supplementary material for: Conservation Status of Milkcaps (Basidiomycota, Russulales, Russulaceae), with Notes on Poorly Known Species
Source: MDPI journal article supplement (doi:10.3390/su131810365), 2021-09-16
Supplement: s1 [file s1]

## 1. *Browsed fungal Red Lists: references and web links*

- Albania: <https://www.nationalredlist.org/files/2015/06/Red-list-of-Albanian-flora-and-fauna-2013-MO-1280-20-11-2013.pdf> (last accessed 7 April 2021).
- Austria: Demon W, Krisai-Greilhuber I (2016) Die Pilze Österreichs. Verzeichnis und Rote Liste 2016. Österreichische Mykologische Gesellschaft, Wien, Austria; <https://www.pilzdaten-austria.eu/#> (last accessed 10 April 2021).
- Benin: Yorou NS, De Kesel A (2011) Champignons supérieurs/Larger fungi. In: Protection de la Nature en Afrique de l'Ouest: Une Liste Rouge pour le Bénin/Nature Conservation in West Africa: Red List for Benin. Neuenschwander P, Sinsin B, Goergen G (eds). International Institute of Tropical Agriculture, Ibadan, Nigeria.
- Bosnia Herzegovina: Federalno Ministarstvo Okoliša I Turizma (2013) Knjiga 4, Crvena lista gljiva Federacij e Bosne I Hercegovine. EU Greenway Sarajevo, Sarajevo. Available at <https://www.fmoit.gov.ba/upload/file/okolis/Crvena%20lista%20gljiva%20FBiH.pdf> (last accessed 7 April 2021).
- Bulgaria: Gyosheva MM, Denchev CM, Dimitrova EG, Assyov B, Petrova RD, Stoichev GT (2006) Red List of fungi in Bulgaria. Mycologia Balcanica 3: 81-87. Available at <http://www.eccf.eu/Bulgaria.pdf> (last accessed 12 March 2021); Peev D, Vladimirov V (2015) Red data book of the Republic of Bulgaria, Volume 1 Plants and Fungi. Institute of Biodiversity and Ecosystem Research. Available at: <http://e-ecodb.bas.bg/rdb/en/vol1/> (last accessed 7 April 2021).
- Canada: <https://www.sararegistry.gc.ca/> (last accessed 15 April 2021).
- Chile: Ministerio del Medio Ambiente - Gobierno de Chile (2018). Inventario nacional de especies de Chile. Available at: [http://especies.mma.gob.cl/CNMWeb/Web/WebCiudadana/WebCiudadana\\_busquedaGrilla.aspx?e-species=amenazadas](http://especies.mma.gob.cl/CNMWeb/Web/WebCiudadana/WebCiudadana_busquedaGrilla.aspx?e-species=amenazadas) (last accessed 12 April 2021).

- China: Ministry of Ecology and Environment of the People's Republic of China and Chinese Academy of Sciences (2018) Redlist of China's Biodiversity — Macrofungi. Beijing, China ([http://www.mee.gov.cn/gkml/sthjbgw/sthjbgg/201805/t20180524\\_441393.htm](http://www.mee.gov.cn/gkml/sthjbgw/sthjbgg/201805/t20180524_441393.htm)).
  
- Colombia: Aguirre J, Rangel-Churio JO (2007) Amenazas a la conservación de las especies de musgos y líquenes en Colombia - Una aproximación inicial. *Caldasia* 29: 235-262. For updated information on Colombian milkcaps, see <https://colfungi.org/> (last accessed 3 April 2021).
  
- Croatia: Tkalčec Z, Mešić A, Matočec N, Kušan I (2008) Red Book of Mushrooms of Croatia. State Institute for Nature Protection and Ministry of Culture, Zagreb.
  
- Cuba: Portales JM, Hernández NB, Vilaró MC, Figueroa SH, Hernández MC, Medina JLO, González SM, Herrera GR, Enríquez D, Friginal GG, Penabad RP (2013) Primera Lista Roja de los hongos de Cuba. <http://repositorio.geotech.cu/jspui/bitstream/1234/1323/1/Primera%20Lista%20Roja%20de%20los%20hongos%20de%20Cuba.pdf> (last accessed 5 April 2021).
  
- Czech Republic: Holec J, Beran M (eds.) (2006) Červený seznam hub (makromycetů) České republiky [Red list of fungi (macromycetes) of the Czech Republic]. *Příroda*, Praha, 24: 1-282. [in Czech with English summary].
  
- Denmark: The Danish Red List (2019) The National Environmental Research Institute, Aarhus University. Available at <http://redlist.dmu.dk> (last accessed 8 April 2021); <https://bios.au.dk/forskningraadgivning/temasider/redlistframe/roedliste-2019/>.
  
- Estonia: Saar I, Oja J, Põldmaa K, Pärtel K, Zettur I, Kõljalg U (2019) Red List of Estonian Fungi – 2019 update. *Folia Cryptogamica Estonica* 56: 117-126.
  
- European Council for the Conservation of Fungi: <http://www.eccf.eu/activities-en.ehtml> ECCF Red List candidates; <https://www.wsl.ch/eccf/>.
  
- Finland: Hyvärinen E, Juslén A, Kemppainen E, Uddström A, Liukko U-M (eds.) (2019) The 2019 Red List of Finnish Species. Ympäristöministeriö & Suomen ympäristökeskus. Helsinki.

Available at <https://helda.helsinki.fi/handle/10138/299501?locale-attribute=env> (last accessed 19 March 2021); <https://punainenkirja.laji.fi/en>.

- France: <https://inpn.mnhn.fr/accueil/recherche-de-donnees/listes-rouges-especes> (regional lists).

- Germany: Dämmrich F, Lotz-Winter H, Schmidt M, Pätzold W, Otto P, Schmitt JA, Scholler M, Schurig B, Winterhoff W, Gminder A, Hardtke HJ, Hirsch G, Karasch P, Lüderitz M, Schmidt-Stohn G, Siepe K, Täglic U, Wöldecke K (2016) Rote Liste der Großpilze und vorläufige Gesamtartenliste der Ständer- und Schlauchpilze (Basidiomycota und Ascomycota) Deutschlands mit Ausnahme der Flechten und der phytoparasitischen Kleinpilze. In: Matzke-Hajek, G., Hofbauer, N. & Ludwig, G. (Bearb.): Rote Liste der gefährdeten Tiere, Pflanzen und Pilze Deutschlands. Band 8: Pilze (Teil 1) – Großpilze. Naturschutz und Biologische Vielfalt 70: 31-433;; <https://www.rote-liste-zentrum.de/en/Grosspilze-Basidiomycota-p-p-Ascomycota-p-p-1774.html>.

- Global Fungal Red List Initiative: <http://iucn.ekoo.se/en/iucn/welcome>.

- Guatemala: Consejo Nacional de Áreas Protegidas - CONAP (2009) Listado de especies amenazadas de Guatemala y Listado de especies de flora y fauna silvestre CITES de Guatemala. Documento técnico 67. CONAP, Gutemala. Available at [https://www.wikiguate.com.gt/w/images/f/f2/Lista\\_de\\_Especies\\_Amenazadas\\_de\\_Guatemala.pdf](https://www.wikiguate.com.gt/w/images/f/f2/Lista_de_Especies_Amenazadas_de_Guatemala.pdf) (last accessed 19 March 2021).

- Hungary: Siller I, Vasas G (1995) Red List of macrofungi of Hungary (revised edition). *Studia Botanica Hungarica* 26: 7-14; Rimoczi I, Siller I, Vasas G, Albert L, Vetter J, Bratek Z (1999) Magyarország Nagygombáinak Javasolt Vörös Listája [Red list of macrofungi in Hungary]. *Clusiana* 38: 107-132. Available at <https://gombanet.hu/a-folyoirat-osszes-szamanak-tartalma-1963-2012> (last accessed 14 April 2021).

- Italy: Rossi G, Montagnani C, Gargano D, Peruzzi L, Abeli T, Ravera S, Cogoni A, Fenu G, Magrini S, Gennai M, Foggi B, Wagensommer RP, Venturella G, Blasi C, Raimondo FM, Orsenigo S (2013) Lista Rossa della Flora Italiana: 1. Policy Species e altre specie minacciate. Italiano IUCN e Ministero dell’Ambiente e della Tutela del Territorio e del Mare.

- International Union for the Conservation of Nature: <https://www.iucnredlist.org/>.

- Japan: Ministry of the Environment (ed.) (2015) Red data book 2014. Threatened wildlife of Japan. Volume 9, Bryophytes, Algae, Lichens, Fungi. Gyōsei: Tokyo, Japan;  
<https://ikilog.biodic.go.jp/Rdb/booklist>; [http://www.biodic.go.jp/english/rdb/rdb\\_f.html](http://www.biodic.go.jp/english/rdb/rdb_f.html).
- Latvia: <https://likumi.lv/doc.php?id=12821> (last accessed 9 April 2021).
- Lithuania: Rašomavičius V (ed.) (2021) Red Data Book of Lithuania. Animal, plants, fungi. Ministry of Environment, Vilnius. Available at <https://www.raudonojiknyga.lt/atsisiusti-lietuvos-raudonaja-knyga-pdf> (last accessed 9 April 2021).
- Malta: Schembri PJ, Sultana J (1989) Red Data Book for the Maltese Islands. Department of Information, Ministry of Education. Available at <https://era.org.mt/wp-content/uploads/2019/05/RedDataBook-MalteseIslands-1989.pdf> (last accessed 9 April 2021).
- Mexico: [https://www.dof.gob.mx/nota\\_detalle.php?codigo=5578808&fecha=14/11/2019](https://www.dof.gob.mx/nota_detalle.php?codigo=5578808&fecha=14/11/2019) (last accessed 7 April 2021).
- Montenegro: Kasom G, Miličković N (2010) Protected species of macrofungi in Montenegro. *Natura Montenegrina* 9: 195-203.
- Netherlands: <https://minlnv.nederlandsesoorten.nl/content/rode-lijsten-soort-van-rode-lijst-paddenstoelen>. See also Arnolds, E.; Veerkamp, M. *Basisrapport Rode Lijst Paddenstoelen*. Nederlandse Mycologische Vereniging: Utrecht, The Netherlands, 2008. Available at <https://www.mycologen.nl/onderzoek/natuurbeheer/rode-lijst/> (last accessed 9 April 2021).
- New Zealand: Hitchmough R (2002) New Zealand Threat Classification System lists 2002. Threatened Species Occasional Publication 23. Wellington, Department of Conservation. Available at <https://www.doc.govt.nz/globalassets/documents/science-and-technical/tsop23pre.pdf> (last accessed 10 April 2021); <https://nztns.org.nz/>.
- North Macedonia: Karadelev M, Rusevska K (2013) Contribution to Macedonian Red List of fungi. Proceedings of the 4th Congress of Ecologists of Macedonia with International Participation, Ohrid, 12-15 October 2012. Macedonian Ecological Society, Special issue 28, Skopje; Karadelev

M, Rusevska K (2016) Distribution maps of critical endangered species from Macedonian Red List of fungi. *Hyla* 2016: 14-18.

- Norway: The Norwegian Biodiversity Information Centre (NBIC) (2019) Norwegian Red List 2015. Version 1.9. Checklist dataset. Available at <https://www.gbif.org/dataset/4f1047ac-a19d-41a8-98eb-d968b2548b53> (last accessed 5 March 2021); Henriksen S, Hilmo O (2015) Norsk rødliste for arter 2015. Artsdatabanken, Norge. Available at [https://artsdatabanken.no/Files/13973/Norsk\\_r\\_dliste\\_for\\_arter\\_2015\\_\(PDF\)](https://artsdatabanken.no/Files/13973/Norsk_r_dliste_for_arter_2015_(PDF)) (last accessed 11 April 2021); <https://artsdatabanken.no/Rodliste>.

- Poland: Wojewoda W, Ławrynowicz, M (2006) Red list of large-fruited mushrooms in Poland. In: Z. Mirek Z, K. Zarzycki K, W. Wojewoda W, Z. Szeląg Z (eds). Red list of plants and fungi in Poland. 3rd. ed. W. Szafer Institute of Botany, Polish Academy of Sciences, Kraków: 53-70. Info on macrofungi available at <https://www.grzyby.pl/czerwona-lista-grzybow.htm> (last accessed 12 April 2012).

- Romania: Tănase C, Pop A (2005) Red List of Romanian Macrofungi Species. In: *Bioplatform – Romanian National Platform for Biodiversity*, Mihăilescu S (ed.), Editura Academiei Române, Bucharest, pp. 101-106. Available at <http://en.societateamicologica.ro/full-list-red-list-species/> (last accessed 12 April 2021).

- Russia: Trutnev YP (ed.) (2008) Red Data Book of the Russian Federation: Plants and fungi [in Russian]. Ministry of Natural Resources and Ecology of the Russian Federation and Rosprirodnadzor, Moscow. Available at <http://oopt.aari.ru/ref/38> (last accessed 11 April 2021).

- Slovakia: Lizon P (2001) Cervený Zoznam Hub Slovenska [Red List of Fungi of Slovakia]. In: Cervený Zoznam Rastlin a Zivocichov Slovenska, Balaz D, Marhold K, Urban P (eds.). Ochrana Prirody (Bratislava), suppl., 20: 6-13.

- Slovenia: Jurc D, Piltaver A, Ogris N (2005) Glive Slovenije: vrste in razširjenost [Fungi of Slovenia: Species and Distribution] Gozdarski inštitut Slovenije, Silva Slovenica, Ljubljana; <http://www.pisrs.si/Pis.web/pregledPredpisa?id=ODRE1883#> (last accessed 11 April 2021); <https://boletusinformativus.si/>.

- Sweden: Artdatabanken (2015) Rödlistade arter i Sverige 2015. ArtDatabanken SLU, Uppsala. Available at <https://artfakta.se/naturvard> (last accessed 12 April 2021).
  
- Switzerland: Senn-Irlet B, Bieri G, Egli S (2007) Rote Liste der gefährdeten Grosspilze der Schweiz. Umwelt-Vollzug Nr. 0718. Hrsg. Bundesamt für Umwelt, Bern, und WSL, Birmensdorf. 92 S; <https://swissfungi.wsl.ch/en/species-promotion/the-red-list-of-endangered-macrofungi-in-switzerland.html> (last accessed 12 April 2021).
  
- UK: Evans S, Henrici A, Ing B (2006) Preliminary Assessment: Red Data List of threatened British Fungi. British Mycological Society. Available at [https://www.britmycolsoc.org.uk/application/files/2013/3537/5755/RDL\\_of\\_Threatened\\_British\\_Fungi.pdf](https://www.britmycolsoc.org.uk/application/files/2013/3537/5755/RDL_of_Threatened_British_Fungi.pdf) (last accessed 25 March 2021). A more recent attempt to assess the conservation status of British macrofungi using the IUCN Red List categories and criteria, carried out by the Fungus Conservation Trust, unfortunately has still not been expanded to include milkcaps (see <http://www.abfg.org/page/nat-fungus-weekend/51/>).
  
- Ukraine: Didukh YP (ed.) (2009) Chervona knyha Ukrainy. Roslynnyi svit (Red Data Book of Ukraine. Plant Kingdom). Globalconsulting: Kiev. Available at <https://redbook-ua.org/ru/page/interesting> (last accessed 11 April 2021).
  
- United States of America: <https://www.fws.gov/endangered/species/>.
  
- Uzbekistan: Beshko N, Khassanov F, Tojibaev KS, Shomurodov KF, Pimenov M, Kljuykov EV, Pratov UP, Belolipov IV, Maltzev II (2009) The Red Data Book of the Republic of Uzbekistan. Chinor ENK.

## 2. Red-listed milkcaps, grouped by IUCN category of higher threat

(see main text and Table 1 for further details)

Extinct (EX): *L. ogasawarashimensis* = 1

Extinct in the Wild (EW): *L. maruiaensis* = 1

Regionally Extinct (RE): *L. acris*, *L. roseozonatus*, *L. sphagneti*, *L. violascens* = 4

Critical Endangered (CR): *L. acerrimus*, *L. albocarneus*, *L. aquizonatus*, *L. aspideus*, *L. aurantifolius*, *L. auriolla*, *L. badiosanguineus*, *L. chamaeleontinus*, *L. citriolens*, *L. evosmus*, *L. fascians*, *L. flavidus*, *L. flexuosus*, *L. foetens*, *L. helvus*, *L. hysginus*, *L. lilacinus*, *L. mairei*, *L. mammosus*, *L. miniatescens*, *L. omphaliformis*, *L. paradoxus*, *L. pilatii*, *L. pterosporus*, *L. repraesentaneus*, *L. resimus*, *L. rubrocinctus*, *L. rufomarginatus*, *L. ruginosus*, *L. salmonicolor*, *L. sanguifluus*, *L. scrobiculatus*, *L. serifluus*, *L. uvidus*, *Lf. luteolus*, *Lf. piperatus*, *Lf. volemus* = 37

Endangered (EN): *L. acatlanensis*, *L. camphoratus*, *L. chrysorrheus*, *L. coccolobae*, *L. controversus*, *L. decipiens*, *L. dryadophilus*, *L. flavopalustris*, *L. fuliginosus*, *L. fuscomarginatus*, *L. fuscus*, *L. hepaticus*, *L. hysginoides*, *L. insulsus*, *L. lacunarum*, *L. lignyotus*, *L. minimus*, *L. musteus*, *L. novae-zelandiae*, *L. necator*, *L. obscuratus*, *L. pallidus*, *L. picinus*, *L. porninsis*, *L. pubescens*, *L. quieticolor*, *L. rufus*, *L. salicis-reticulatae*, *L. semisanguifluus*, *L. silviae*, *L. spinosulus*, *L. strigosipes*, *L. subumbonatus*, *L. terenopus*, *L. theiogalus*, *L. tithymalinus*, *L. vietus*, *L. vinosus*, *L. zonarioides*, *L. zonarius*, *Lf. bertillonii* = 41

Vulnerable (VU): *L. acrissimus*, *L. afroscrobiculatus*, *L. aurantiacus*, *L. azonites*, *L. brunneoviolaceus*, *L. changbaiensis*, *L. chiapanensis*, *L. cistophilus*, *L. clethrophilus*, *L. cyathuliformis*, *L. edulis*, *L. haugiae*, *L. ichoratus*, *L. ilicis*, *L. lepidotus*, *L. luridus*, *L. mediterraneus*, *L. nanus*, *L. pseudouvidus*, *L. romagnesii*, *L. rostratus*, *L. salicis-herbaceae*, *L. scoticus*, *L. stephensii*, *L. subruginosus*, *L. torminosus*, *L. trivialis*, *Lf. glaucescens*, *Lf. hallingii*, *Lf. vellereus* = 30

Near Threatened (NT): *L. alpinus*, *L. atlanticus*, *L. borzianus*, *L. cremor*, *L. deliciosus*, *L. deterrimus*, *L. fennoscandicus*, *L. fulvissimus*, *L. illyricus*, *L. leonis*, *L. olivinus*, *L. tesquorum* = 12

LC: *L. aestivus*, *L. aurantiofulvus*, *L. aurantiosordidus*, *L. blennius*, *L. britannicus*, *L. brunneohepaticus*, *L. californiensis*, *L. castaneus*, *L. chelidonium*, *L. chichuensis*, *L. circellatus*, *L. corrugis*, *L. duplicatus*, *L. favrei*, *L. flavospideus*, *L. fluens*, *L. gerardii*, *L. glyciosmus*, *L. gracilis*, *L. hatsudake*, *L. hortensis*, *L. hygrophoroides*, *L. indigo*, *L. intermedius*, *L. kauffmanii*, *L. lanceolatus*, *L. lapponicus*, *L. lignicola*, *L. obliquus*, *L. occidentalis*, *L. pallescens*, *L. pergamenus*, *L. pinastri*, *L. pseudomucidus*, *L. pyrogalus*, *L. quietus*, *L. rubidus*, *L. rubrilacteus*, *L. rufulus*, *L. subcircellatus*, *L. subdulcis*, *L. subplinthogalus*, *L. subzonarius*, *L. syringinus*, *L. tabidus*, *L. torminosulus*, *L. tuomikoskii*, *L. utilis*, *L. xanthogalactus*, *Lf. rugatus*, *Lf. subgerardii*, *Lf. subpiperatus*, *Lf. subvellerus* = 53

DD: *L. agglutinatus*, *L. albivellus*, *L. angustifolius*, *L. areolatus*, *L. atro-olivaceus*, *L. atrosquamulosus*, *L. atroviridis*, *L. aurantiacoochraceous*, *L. bisporus*, *L. blumii*, *L. bresadolanus*, *L. carbonicola*, *L. castanopsidis*, *L. cinnamomeus*, *L. cinereus*, *L. cookei*, *L. cordovaensis*, *L. croceus*, *L. cyathula*, *L. delicatus*, *L. echinatus*, *L. fallax*, *L. firmus*, *L. flavidulus*, *L. fraxineus*, *L. fuliginellus*, *L. fusco-olivaceus*, *L. grandisporus*, *L. griseus*, *L. helodes*, *L. hirtipes*, *L. imbricatus*, *L. imperceptus*, *L. iners*, *L. luculentus*, *L. luteocanus*, *L. maculatus*, *L. mucidus*, *L. muscicola*, *L. mutabilis*, *L. nigroviolascens*, *L. nothofagi*, *L. oedehyphosus*, *L. oedematopus*, *L. omeiensis*, *L. pallidiolivaceus*, *L. paludinellus*, *L. parvus*, *L. peckii*, *L. pinckneyensis*, *L. rimosellus*, *L. robertianus*, *L. sakamotoi*, *L. salmoneus*, *L. saylorii*, *L. similissimus*, *L. sordidus*, *L. squamulosus*, *L. subflammeus*, *L. subolivaceus*, *L. subserifluus*, *L. subtomentosus*, *L. subvillosus*, *L. sumstinei*, *L. tristis*, *L. umbrinus*, *L. vinaceorufescens*, *L. waltersii*, *L. wangii*, *L. wenquanensis*, *Lf. atrovelutinus*, *Lf. ochrogalactus*, *Lf. pilosus*, *Lf. puberulus*, *Lf. subvolemus*, *Lf. tenuicystidiatus*, *Lf. vitellinus* = 77

NA: *L. sanguineus*, *L. subsericeus* = 2

NE/Proposed: *L. austrorostratus*, *L. crassus*, *L. kesiyae*, *L. luteus*, *L. paulus*, *L. pseudoscrobiculatus*, *L. rubriviridis* = 7

Total = 265
